# Supplementary material for: Optical and electrochemical properties of heteroditopic ion receptors derived from crown ether-based calix[4]arene with amido-anthraquinone pendants
Source: Royal Society of Chemistry journal article supplement (doi:10.1039/c2ob00048b), 2012-01-01
Supplement: c2ob00048b.pdf [file c2ob00048b.pdf]

# Optical and electrochemical properties of heteroditopic ion receptors derived from crown ether-based calix[4]arene with amido-anthraquinone pendants

Benjamat Chailap and Thawatchai Tuntulani\*

*Department of Chemistry, Faculty of Science, Chulalongkorn University, Phayathai Road,  
Bangkok, Thailand  
thawatchai.t@chula.ac.th*

## Supplementary data

| Contents:                                                                                                                                                                       | page |
|---------------------------------------------------------------------------------------------------------------------------------------------------------------------------------|------|
| <b>Fig. S1-S2:</b> $^1\text{H-NMR}$ , $^{13}\text{C-NMR}$ spectra of <b>1-a</b>                                                                                                 | 2    |
| <b>Fig. S3-S4:</b> $^1\text{H-NMR}$ , $^{13}\text{C-NMR}$ spectra of <b>1</b>                                                                                                   | 4    |
| <b>Fig. S5-S6:</b> $^1\text{H-NMR}$ , $^{13}\text{C-NMR}$ spectra of <b>2-a</b>                                                                                                 | 6    |
| <b>Fig. S7-S8:</b> $^1\text{H-NMR}$ , $^{13}\text{C-NMR}$ spectra of <b>2</b>                                                                                                   | 8    |
| <b>Fig. S9 :</b> $^1\text{H-NMR}$ titration of <b>1</b> and $\text{KPF}_6$ .                                                                                                    | 10   |
| <b>Fig. S10:</b> $^1\text{H-NMR}$ titration of <b>2</b> and $\text{KPF}_6$ .                                                                                                    | 11   |
| <b>Fig. S11:</b> Normalized fluorescence emission spectra spectra of <b>1</b> and <b>2</b> in various solvents.                                                                 | 12   |
| <b>Fig. S12:</b> Fluorescence emission spectra of <b>2</b> and $\text{TBAF}\cdot 3\text{H}_2\text{O}$ in the absence and presence of $\text{KPF}_6$ in $\text{CH}_3\text{CN}$ . | 12   |
| <b>Fig. S13:</b> Job's plot of <b>1</b> and <b>1</b> + $\text{K}^+$ with $\text{TBAF}\cdot 3\text{H}_2\text{O}$                                                                 | 13   |
| <b>Fig. S14:</b> Job's plot of <b>2</b> with $\text{TBAF}\cdot 3\text{H}_2\text{O}$                                                                                             | 13   |
| <b>Fig. S15:</b> Fitting graph of emission titration of <b>1</b> and $\text{TBAF}\cdot 3\text{H}_2\text{O}$                                                                     | 14   |
| <b>Fig. S16:</b> Fitting graph of emission titration of <b>1</b> + $\text{K}^+$ and $\text{TBAF}\cdot 3\text{H}_2\text{O}$                                                      | 14   |
| <b>Fig. S17:</b> Fitting graph s of emission titration of <b>2</b> and $\text{TBAF}\cdot 3\text{H}_2\text{O}$                                                                   | 15   |
| <b>Fig. S18:</b> Cyclic voltammograms of <b>1</b> and <b>2</b>                                                                                                                  | 15   |

---

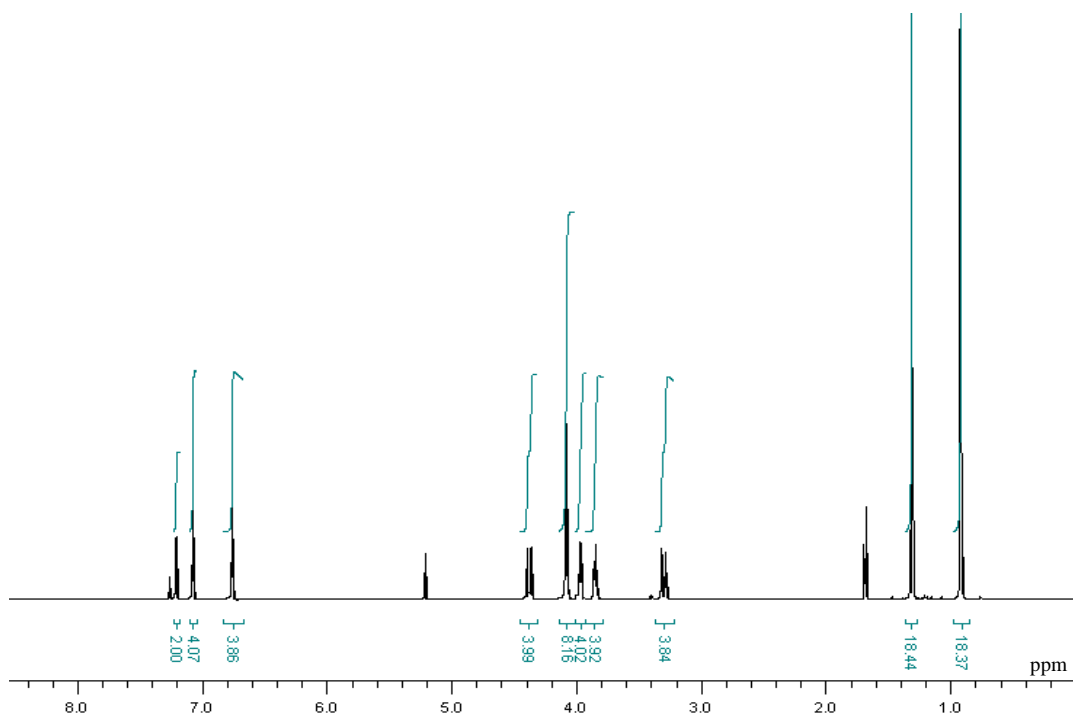

**Fig. S1-a** <sup>1</sup>H-NMR spectrum of **1-a** in CDCl<sub>3</sub> plotted from Mestrec program

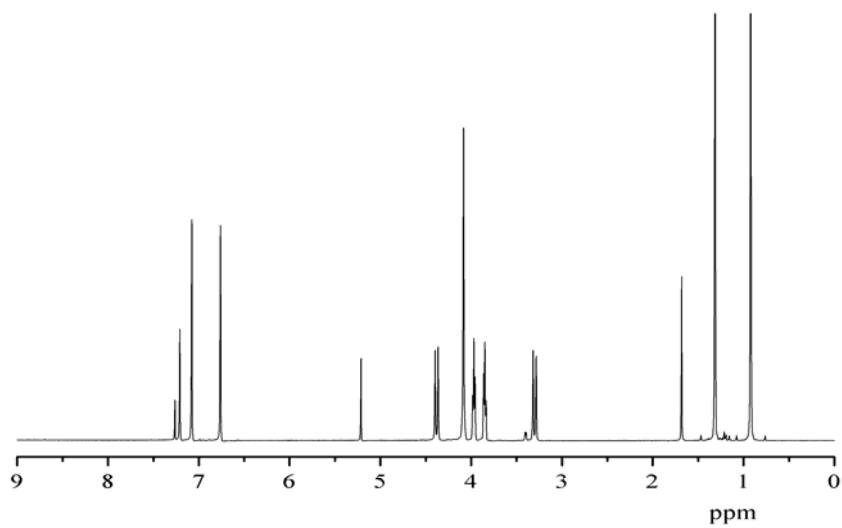

**Fig. S1-b** <sup>1</sup>H-NMR spectrum of **1-a** in CDCl<sub>3</sub> plotted from Origin program

**$^{13}\text{C}$ -NMR spectrum of 1-a**

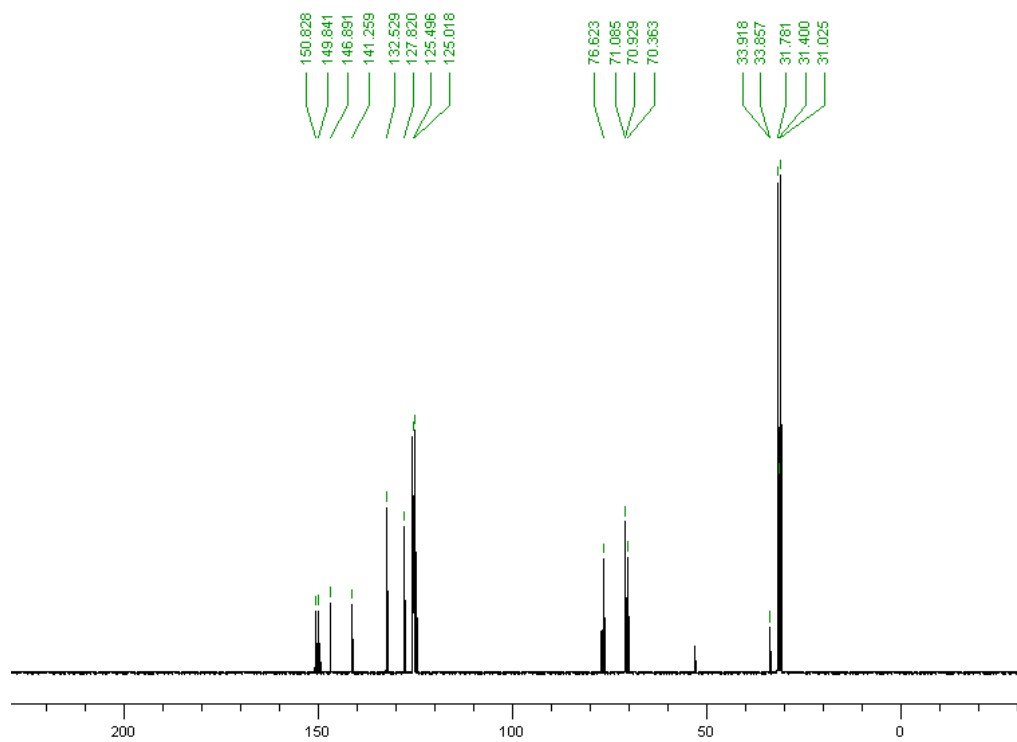

**Fig. S2**  $^{13}\text{C}$ -NMR spectrum of 1-a in  $\text{CDCl}_3$

$^1\text{H-NMR}$  spectrum of **1**

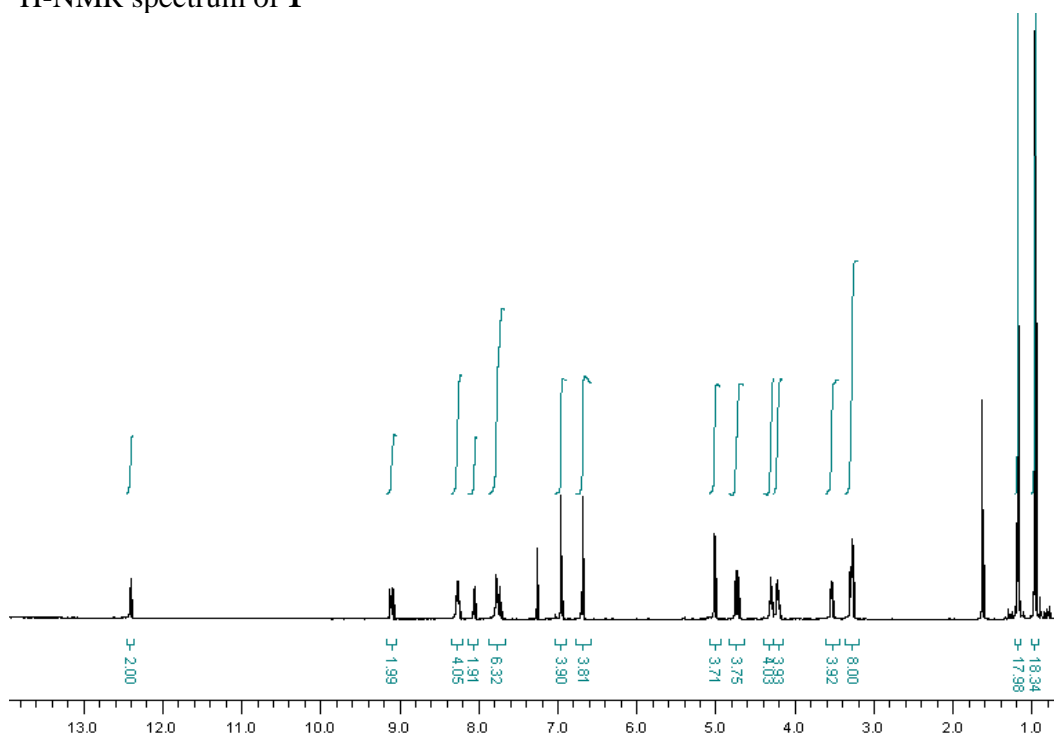

**Fig. S3-a**  $^1\text{H-NMR}$  spectrum of **1** in  $\text{CDCl}_3$  plotted from mestrec program

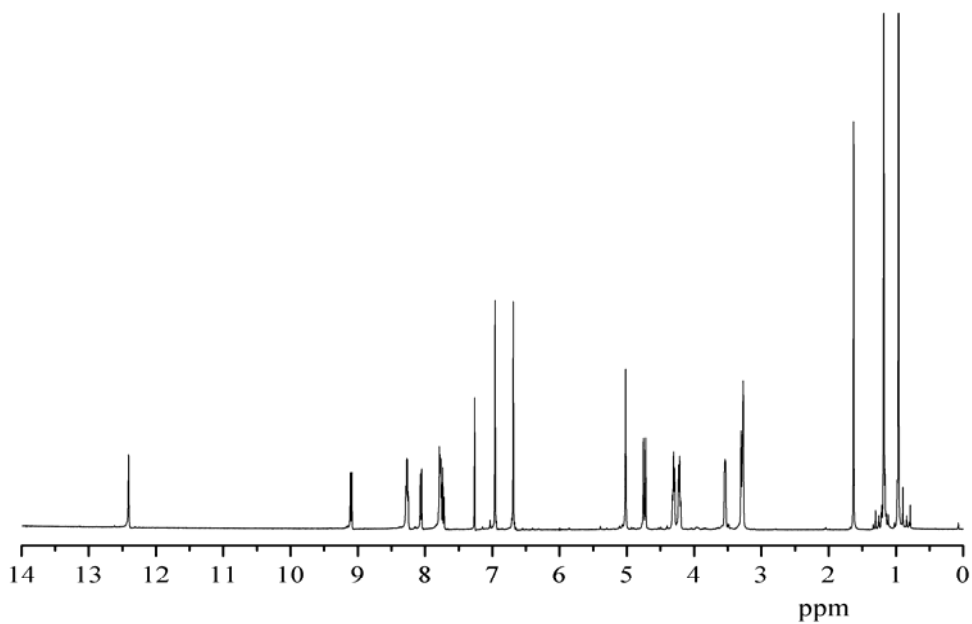

**Fig. S3-b**  $^1\text{H-NMR}$  spectrum of **1** in  $\text{CDCl}_3$  plotted from origin program

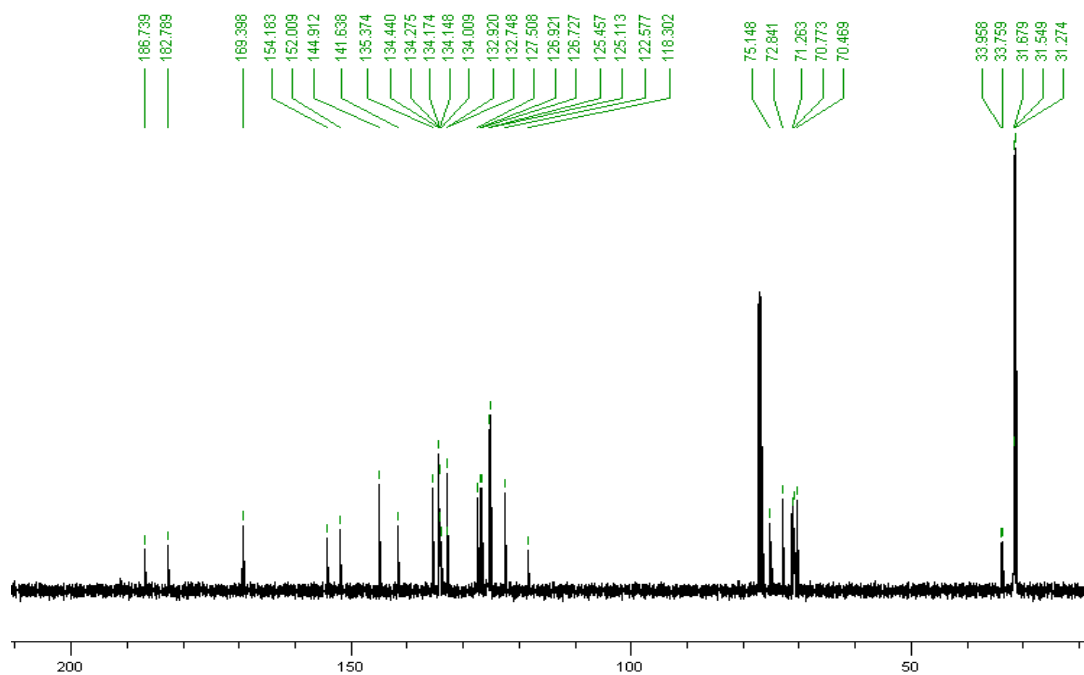

**Fig. S4**  $^{13}\text{C}$ -NMR spectrum of **1** in  $\text{CDCl}_3$

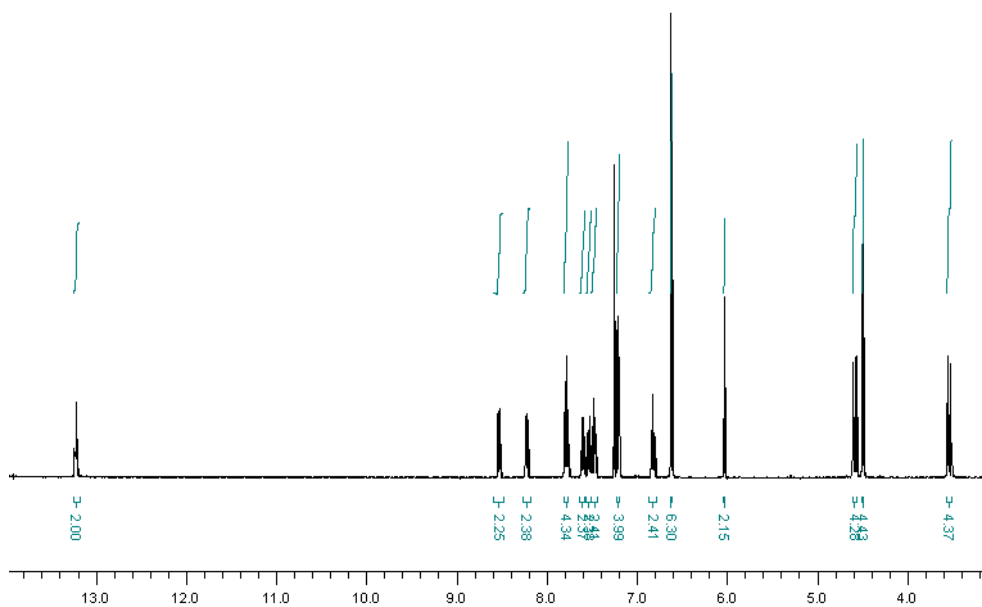

**Fig. S5-a** <sup>1</sup>H-NMR spectrum of **2-a** in CDCl<sub>3</sub> plotted from Mestrec program

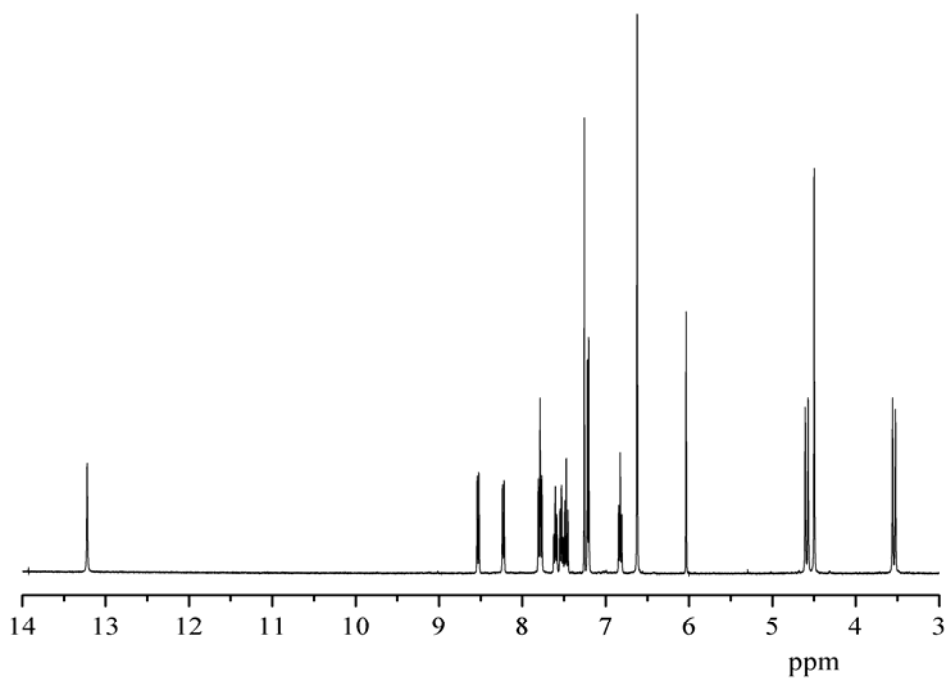

**Fig. S5-b** <sup>1</sup>H-NMR spectrum of **2-a** in CDCl<sub>3</sub> plotted from Origin program

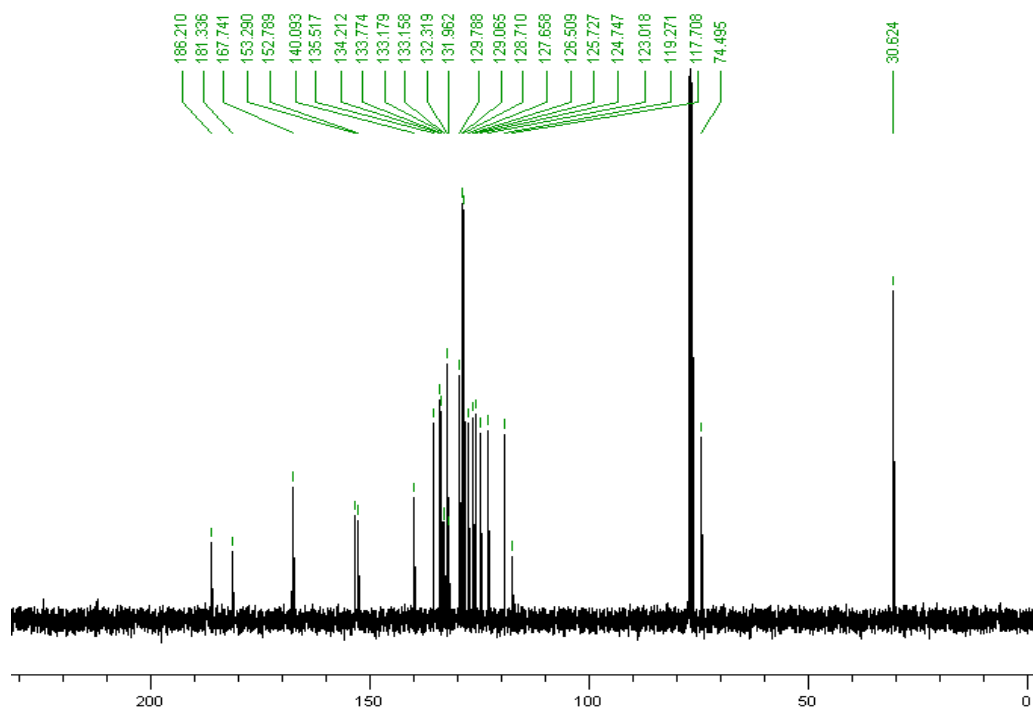

**Fig. S6**  $^{13}\text{C}$ -NMR spectrum of **2-a** in  $\text{CDCl}_3$

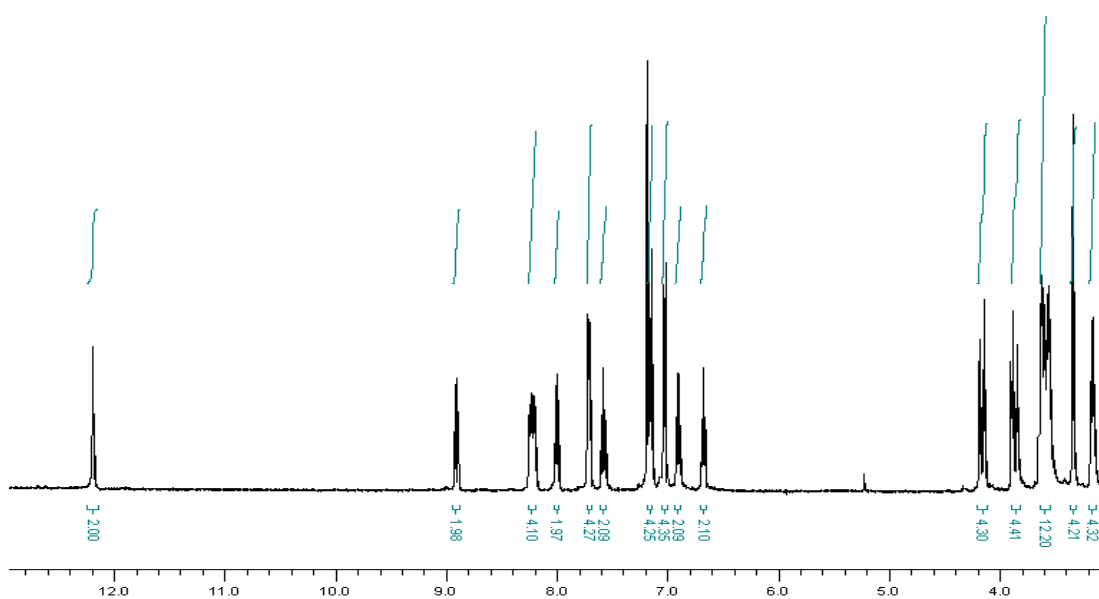

**Fig. S7-a** <sup>1</sup>H-NMR spectrum of **2** in CDCl<sub>3</sub> plotted from MestReC program

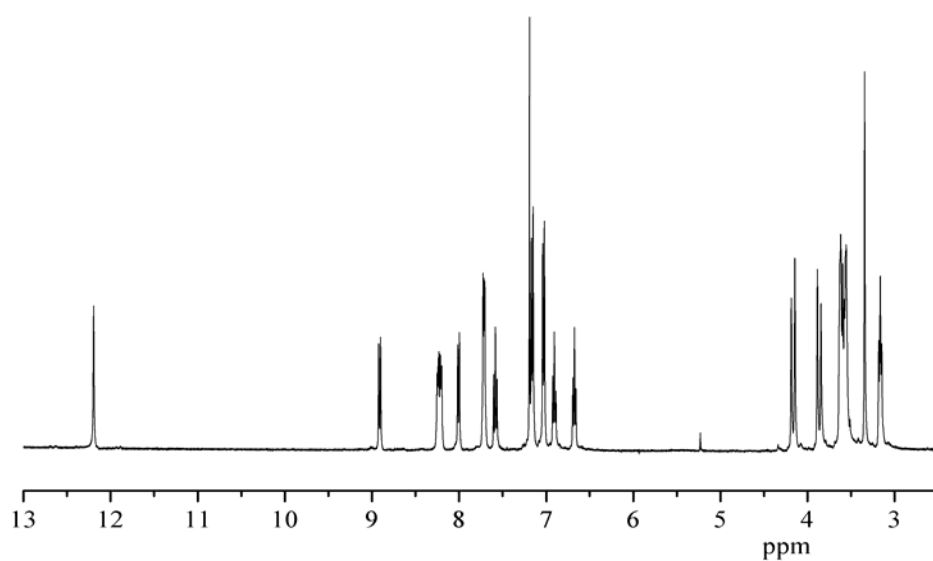

**Fig. S7-b** <sup>1</sup>H-NMR spectrum of **2** in CDCl<sub>3</sub> plotted from Origin program



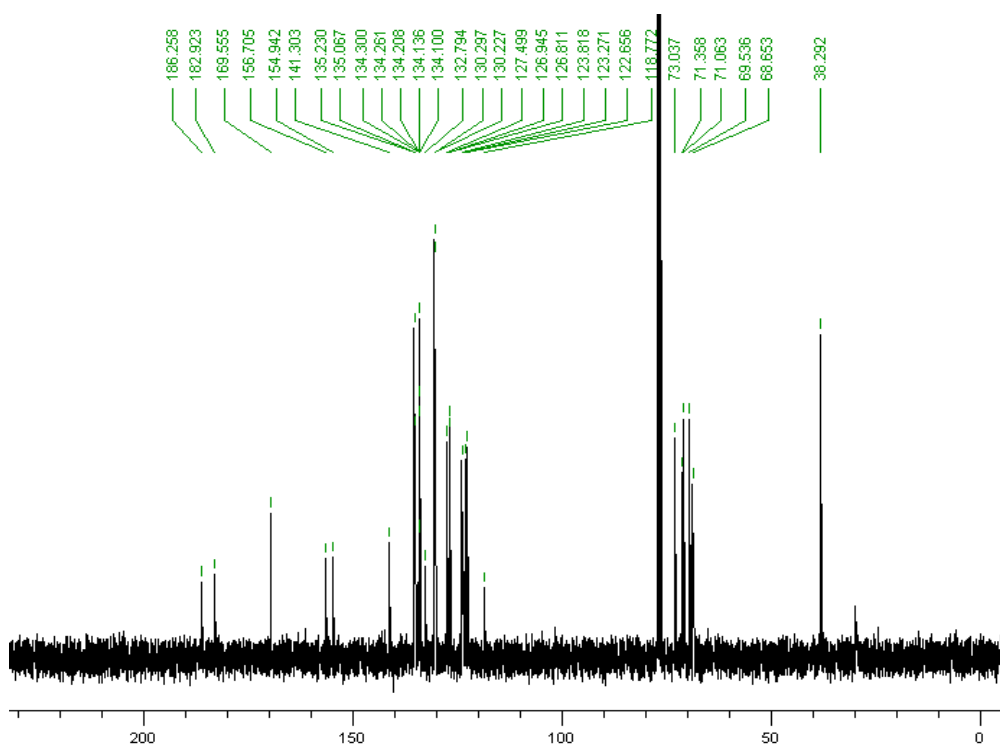

**Fig. S8**  $^{13}\text{C}$ -NMR spectrum of **1** in  $\text{CDCl}_3$  plotted from mestrec program

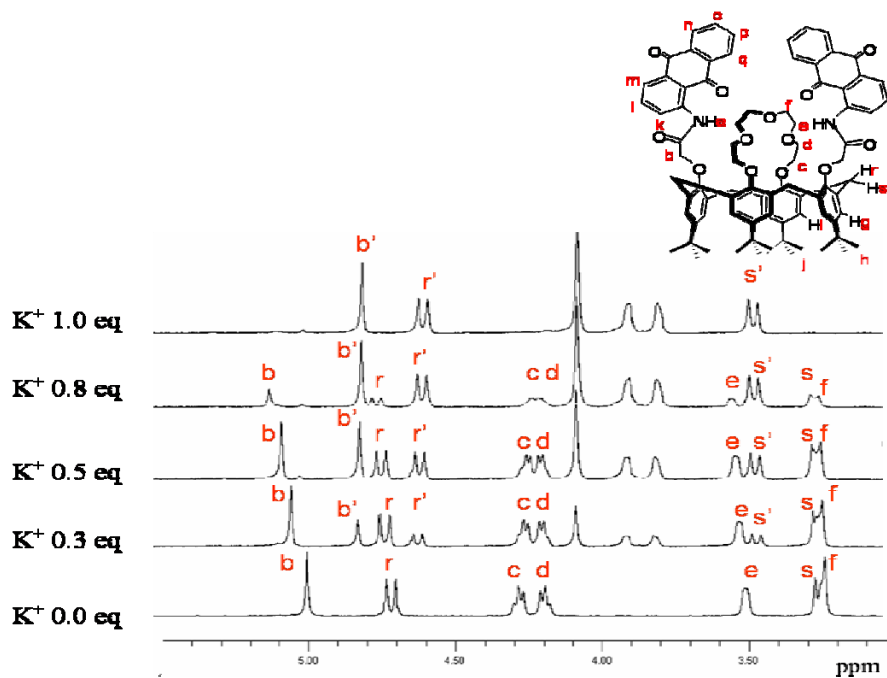

**Fig. S9** <sup>1</sup>H NMR titration spectrum between receptor **1** and potassium ions in 5% v/v CD<sub>3</sub>CN in CDCl<sub>3</sub> showed slow complexation/decomplexation process. X and X' represented protons of decomplexes and complexes with K<sup>+</sup>, respectively.

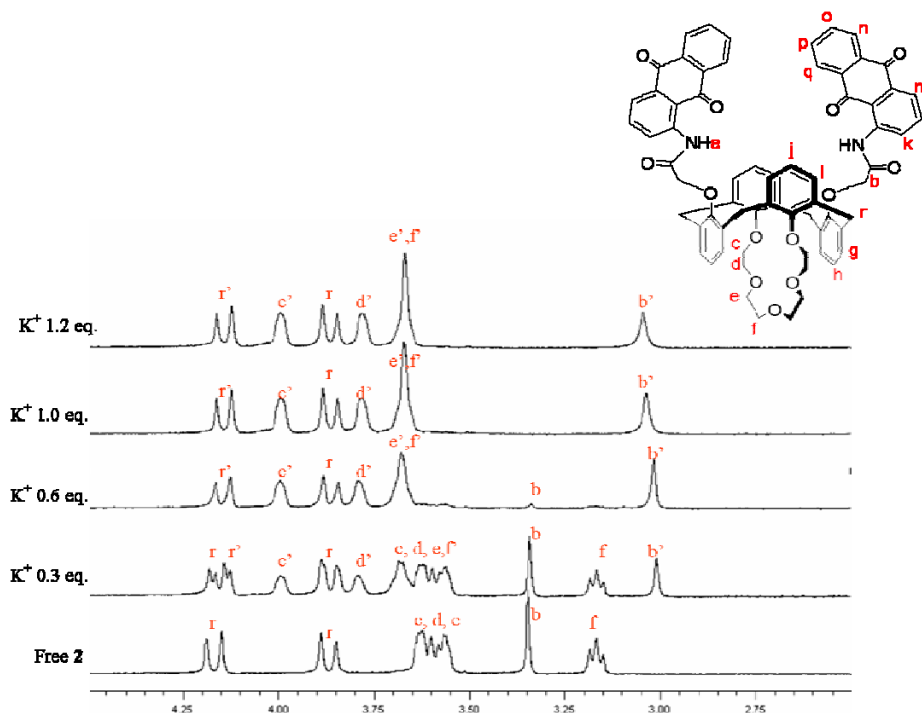

**Fig. S10**  $^1\text{H}$  NMR titration spectrum between receptor **2** and potassium ions in 5% v/v  $\text{CD}_3\text{CN}$  in  $\text{CDCl}_3$  showed slow complexation/decomplexation process. X and X' represented protons of decomplexes and complexes with  $\text{K}^+$ , respectively.

**Remark:** The AB signals of methylene protons  $r'$  and  $s'$  of compound **1** upon complexing  $\text{K}^+$  shifted more upfield and downfield, respectively as compared to the AB signals of 1,3-alternate compound **2**. This indicates a large cone angle change in the cone conformation of compound **1** upon binding  $\text{K}^+$ .

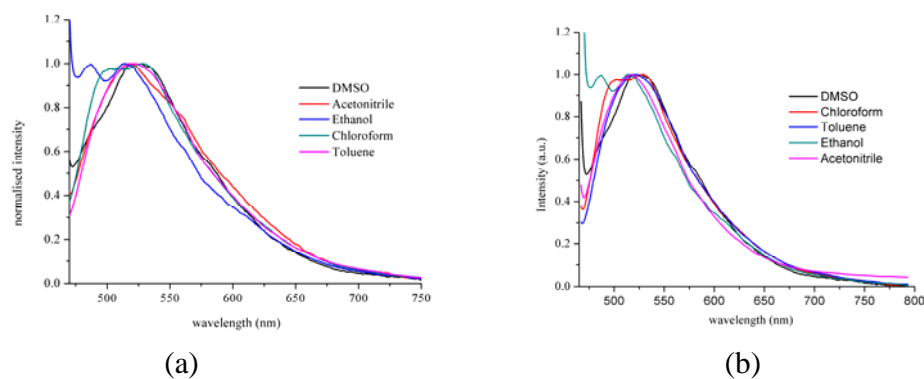

**Fig. S11** Normalized fluorescence emission spectra spectra of (a) **1** (50 μM) and (b) **2** (50 μM) in various solvents.

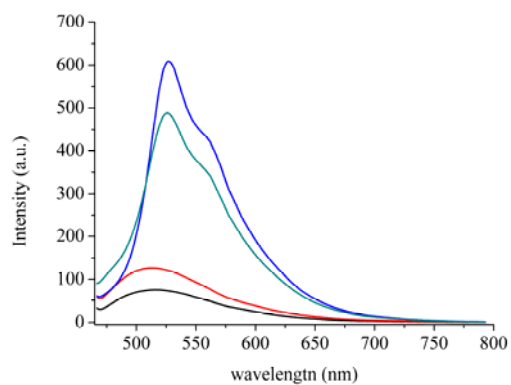

**Fig. S12** Fluorescence emission spectra of **2** (50 μM) and TBAF·3H<sub>2</sub>O (100 equiv.) in the absence (blue spectrum) and presence (green spectrum) of KPF<sub>6</sub> (1.2 equiv.) in CH<sub>3</sub>CN.

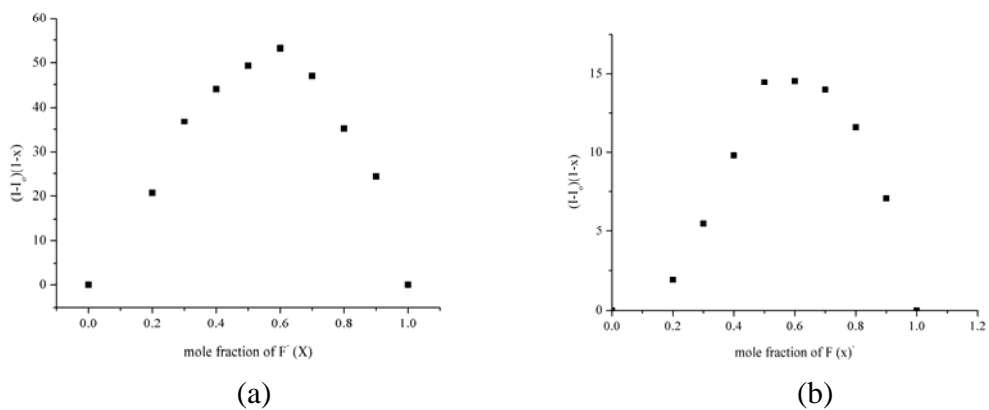

**Fig. S13** Job's plot of (a) **1** and (b) **1** + K<sup>+</sup> (1.2 eq.) with TBAF·3H<sub>2</sub>O in CHCl<sub>3</sub>

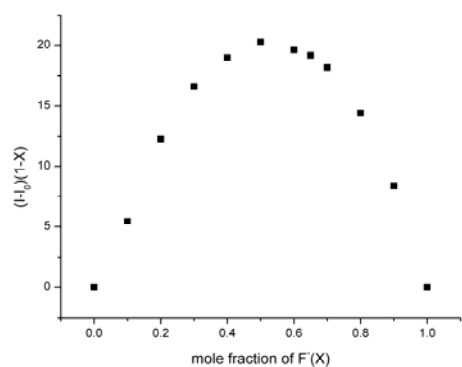

**Fig. S14** Job's plot of **2** with TBAF·3H<sub>2</sub>O in CHCl<sub>3</sub>

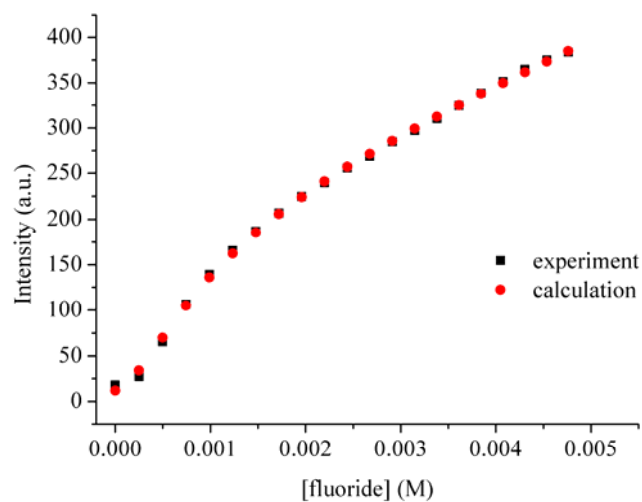

**Fig. S15** Fitting graph of emission titration at 542 nm between **1** and TBAF·3H<sub>2</sub>O calculated from SPECFIT32 software

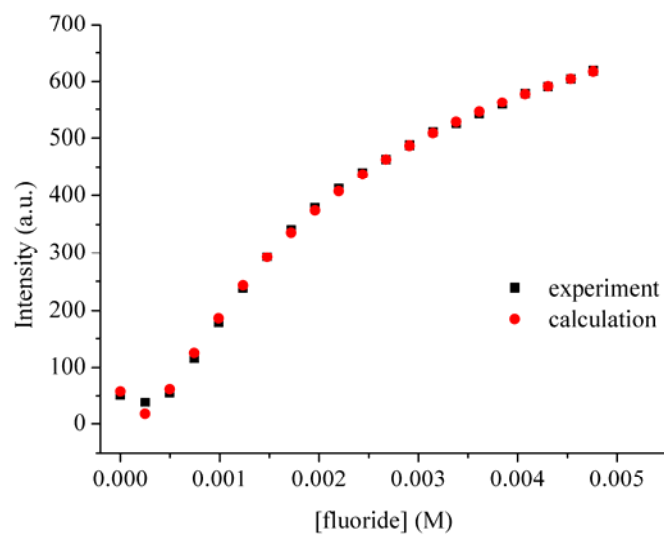

**Fig.S16** Fitting graph of emission titration at 542 nm between **1+K<sup>+</sup>** and TBAF·3H<sub>2</sub>O calculated from SPECFIT32 software

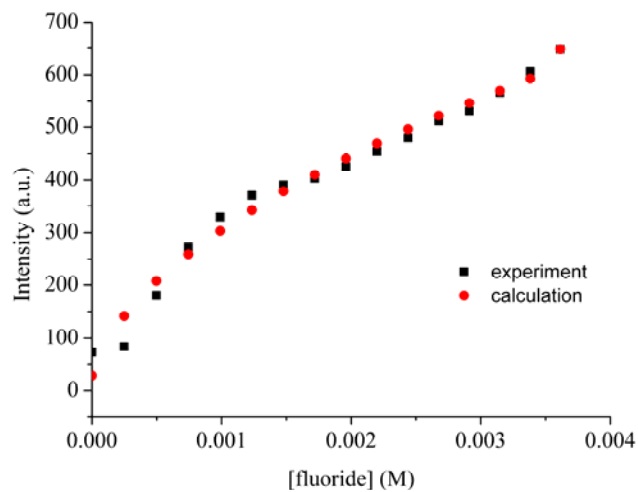

**Fig.S17** Fitting graph of emission titration at 542 nm between **2** and TBAF·3H<sub>2</sub>O calculated from SPECFIT32 software

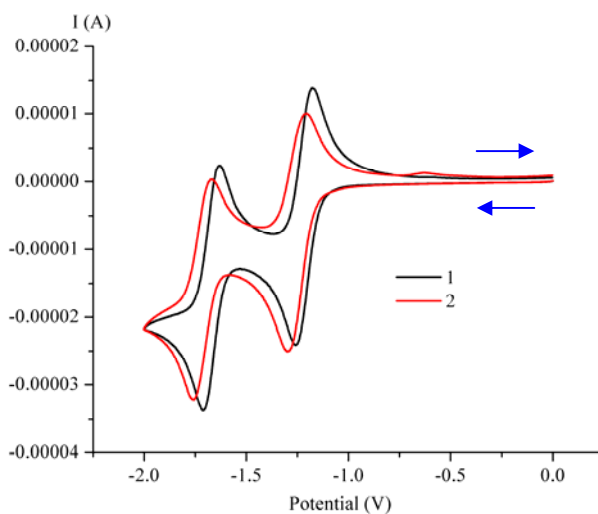

**Fig. S18** Cyclic voltammograms of **1** (1 mM) and **2** (1 mM) in 40% CH<sub>3</sub>CN:CH<sub>2</sub>Cl<sub>2</sub> with 0.1 M TBAPF<sub>6</sub> at scan rate 50 mV. Blue arrows represent scanned direction.
